# Supplementary material
Source: publisher figshare collection journal article supplement (https://karger.figshare.com/ndownloader/files/23581877)
Supplement: Supplementary file 1 [file 23581877]

Table S3. List of antibodies

| Name | Cat.no | Company | Dilution |
| --- | --- | --- | --- |
| SEMA3C | MAB1728 | R&D Systems | 1:500 |
| pERK(T202/Y204) | 4370 | Cell signaling | 1:2000 |
| ERK | 9102 | Cell signaling | 1:2000 |
| CyclinD1 | 2978 | Cell signaling | 1:1000 |
| CyclinE1 | 4129 | Cell signaling | 1:1000 |
| CDK4 | 12790 | Cell signaling | 1:2000 |
| CDK2 | sc-163 | Santa cruz | 1:500 |
| HA | MMS-101P | BioLegend | 1:2000 |
| β-actin | A300-491A | Bethyl | 1:10000 |
| Goat anti-rabbit IgG-HRP | ADI-SAB-300-J | Enzo | 1:2500 |
| Goat anti-mouse IgG-HRP | ADI-SAB-300-J | Enzo | 1:2500 |
| Goat anti-rat IgG-HRP | ab97057 | Abcam | 1:10000 |
